# Supplementary material for: Array-based specific classification of bacterial species via ligands with dimethylamino/amino groups
Source: Royal Society of Chemistry journal article supplement (doi:10.1039/d4ay00903g), 2024-01-01
Supplement: d4ay00903g1.pdf [file d4ay00903g1.pdf]

## Supplementary Information

### **Array-based specific classification of bacterial species via the ligands with dimethylamino/amino groups**

Xizhe Li,<sup>a‡</sup> Fan Yang,<sup>d‡</sup> Haojie Li,<sup>a‡</sup> Zhi Hu,<sup>c</sup> Weiting Yu,<sup>c</sup> Yuchen Zhang,<sup>b\*</sup> and Jie Gao<sup>a\*</sup>

*a. Interdisciplinary Research Center of Biology & Catalysis, School of Life Sciences, Northwestern Polytechnical University, Xi'an 710072, China. E. mail: jgao@nwpu.edu.cn*

*b. Department of Pharmacy, Xi'an No. 3 Hospital, The Affiliated Hospital of Northwest University, Xi'an 710021, China. E. mail: chenyuzhuonian1026@outlook.com*

*c. College of Environment, Zhejiang University of Technology, Hangzhou 310032, China.*

*d. Xingzichuan Drilling Company, Yanchang Oil Mine Management Bureau, Yanan 717400, China*

*‡These authors contributed to this work equally.*

## 1. Chemical structure of ligands

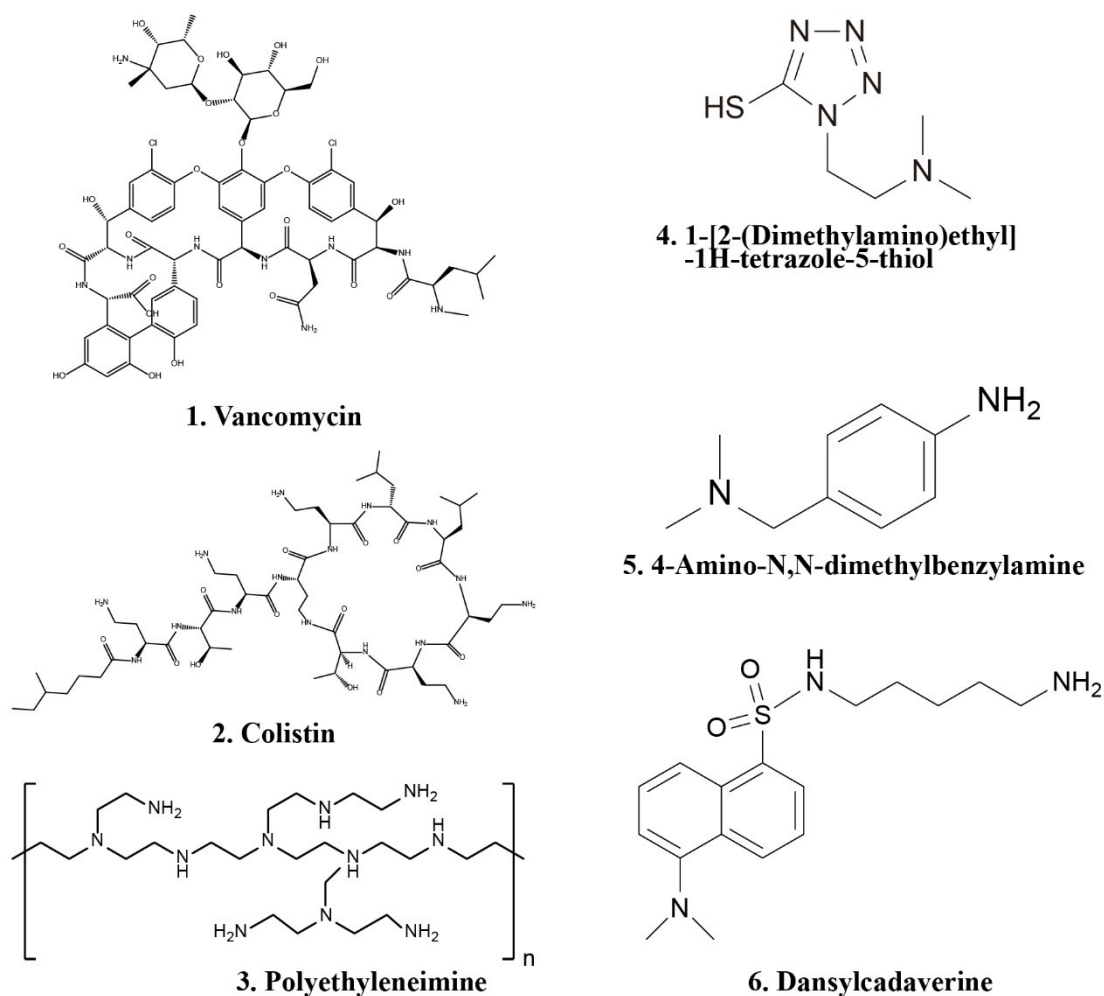

**Figure S1.** Chemical structure of the 6 ligands.

## 2. Detailed information of the ligands

**Table S1.** Detailed chemical information of the 12 ligands.

| No | Compound                                                                        | CAS number | Molecular mass | Molecular formula                                                              | LogP* | Abbr     | Concentrations used in this study |
|----|---------------------------------------------------------------------------------|------------|----------------|--------------------------------------------------------------------------------|-------|----------|-----------------------------------|
| 1  | Vancomycin                                                                      | 1404-93-9  | 1485.71        | C <sub>66</sub> H <sub>76</sub> Cl <sub>3</sub> N <sub>9</sub> O <sub>24</sub> | -1.44 | Vanco    | 0.6%                              |
| 2  | Colistin (Polymyxin E)                                                          | 1264-72-8  | 1155.43        | C <sub>52</sub> H <sub>98</sub> N <sub>16</sub> O <sub>13</sub>                | -3.68 | Colistin | 0.005%                            |
| 3  | PEI (Polyethyleneimine)                                                         | 9002-98-6  | ~1800          | (CH <sub>2</sub> CH <sub>2</sub> NH) <sub>n</sub>                              | -5.41 | PEI      | 5 mM                              |
| 4  | 1-[2-(Dimethylamino)ethyl]-1H-tetrazole-5-thiol                                 | 61607-68-9 | 173.24         | C <sub>5</sub> H <sub>11</sub> N <sub>5</sub> S                                | 0.28  | MTZ      | 1.5 mM                            |
| 5  | 4-Amino-N,N-dimethylbenzylamine                                                 | 6406-74-2  | 150.2          | C <sub>9</sub> H <sub>14</sub> N <sub>2</sub>                                  | 0.7   | DMBA     | 15 mM                             |
| 6  | Dansylcadaverine (N-(Dimethyl-amino-naphtha-lene-sulfonyl)-1,5-pentane-diamine) | 10121-91-2 | 335.46         | C <sub>17</sub> H <sub>23</sub> N <sub>3</sub> O <sub>2</sub> S                | 2.83  | Dansyl   | 3.5 mM                            |

\*Predicted data is generated using the ACD/Labs Percepta Platform-PhysChem Module.

### 3. Detailed information of the bacteria

**Table S2.** Detailed information of the 16 kinds of bacteria.

| No | Name of bacteria                                   | Abbreviation            | Gram species | Strains      |
|----|----------------------------------------------------|-------------------------|--------------|--------------|
| 1  | <i>Staphylococcus aureus</i> 1                     | <i>S. aureus</i> 1      | positive     |              |
| 2  | <i>Staphylococcus aureus</i> 2                     | <i>S. aureus</i> 2      | positive     |              |
| 3  | <i>Staphylococcus aureus</i> 3                     | <i>S. aureus</i> 3      | positive     |              |
| 4  | Methicillin-resistant <i>Staphylococcus aureus</i> | MRSA                    | positive     |              |
| 5  | <i>Listeria monocytogenes</i>                      | <i>L. monocytogenes</i> | positive     |              |
| 6  | <i>Enterococcus faecalis</i>                       | <i>E. faecalis</i>      | positive     |              |
| 7  | <i>Bacillus subtilis</i>                           | <i>B. subtilis</i>      | positive     |              |
| 8  | <i>Streptococcus mutans</i>                        | <i>S. mutans</i>        | positive     |              |
| 9  | <i>Escherichia coli</i>                            | <i>E. coli</i>          | negative     | CMCC(B)44102 |
| 10 | <i>Escherichia coli</i> BL21                       | <i>E. coli</i> BL21     | negative     | BL21         |
| 11 | <i>Pseudomonas aeruginosa</i>                      | <i>P. aeruginosa</i>    | negative     |              |
| 12 | <i>Pseudomonas fluorescens</i>                     | <i>P. fluorescens</i>   | negative     |              |
| 13 | <i>Salmonella paratyphi</i> B                      | <i>S. paratyphi</i> B   | negative     |              |
| 14 | <i>Shigella flexneri</i>                           | <i>Sh. flexneri</i>     | negative     |              |
| 15 | <i>Enterobacter sakazakii</i>                      | <i>E. sakazakii</i>     | negative     |              |
| 16 | <i>Enterobacter cloacae</i>                        | <i>E. cloacae</i>       | negative     |              |

### 4. UV-Vis spectra for 16 bacteria and 12 bacterial mixtures discrimination

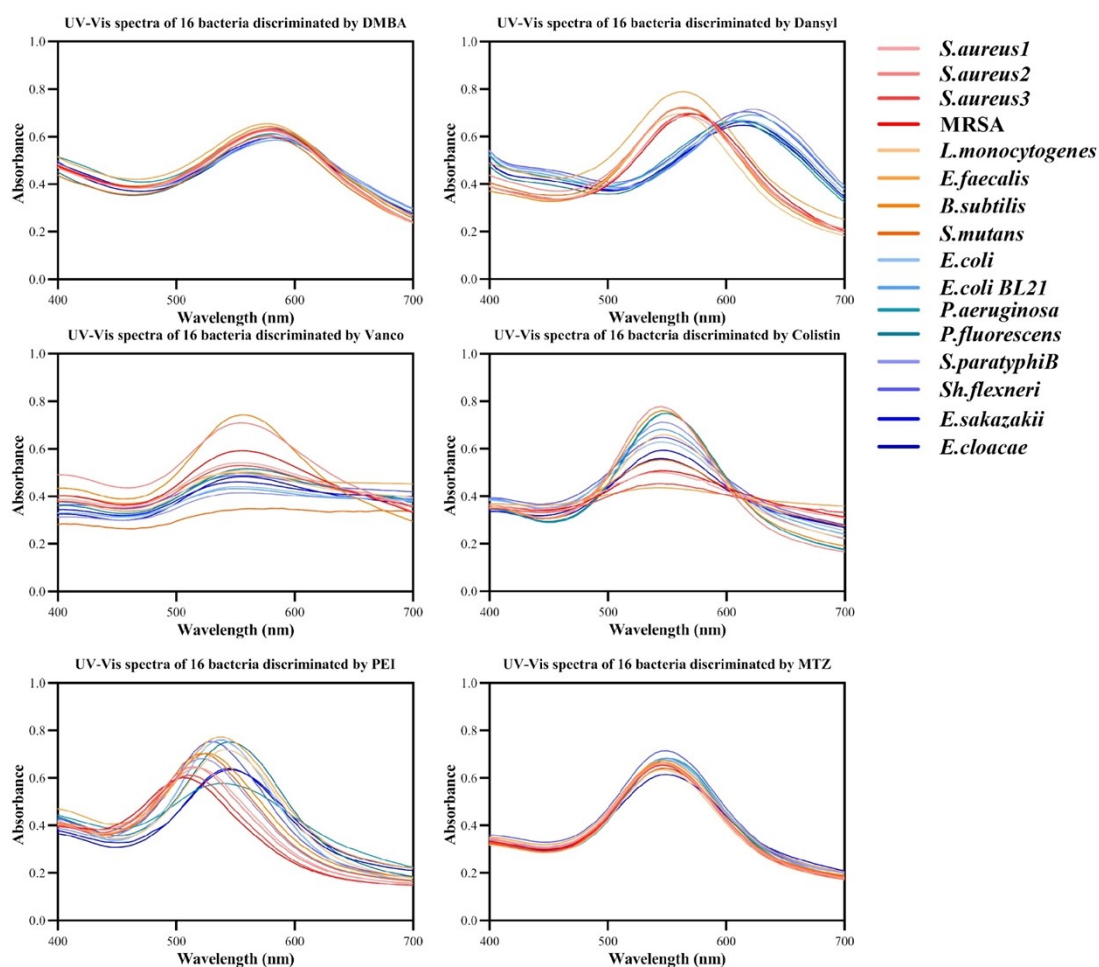

**Figure S2.** UV-Vis spectra of sensor arrays with 16 bacteria (OD<sub>600</sub>=0.05).

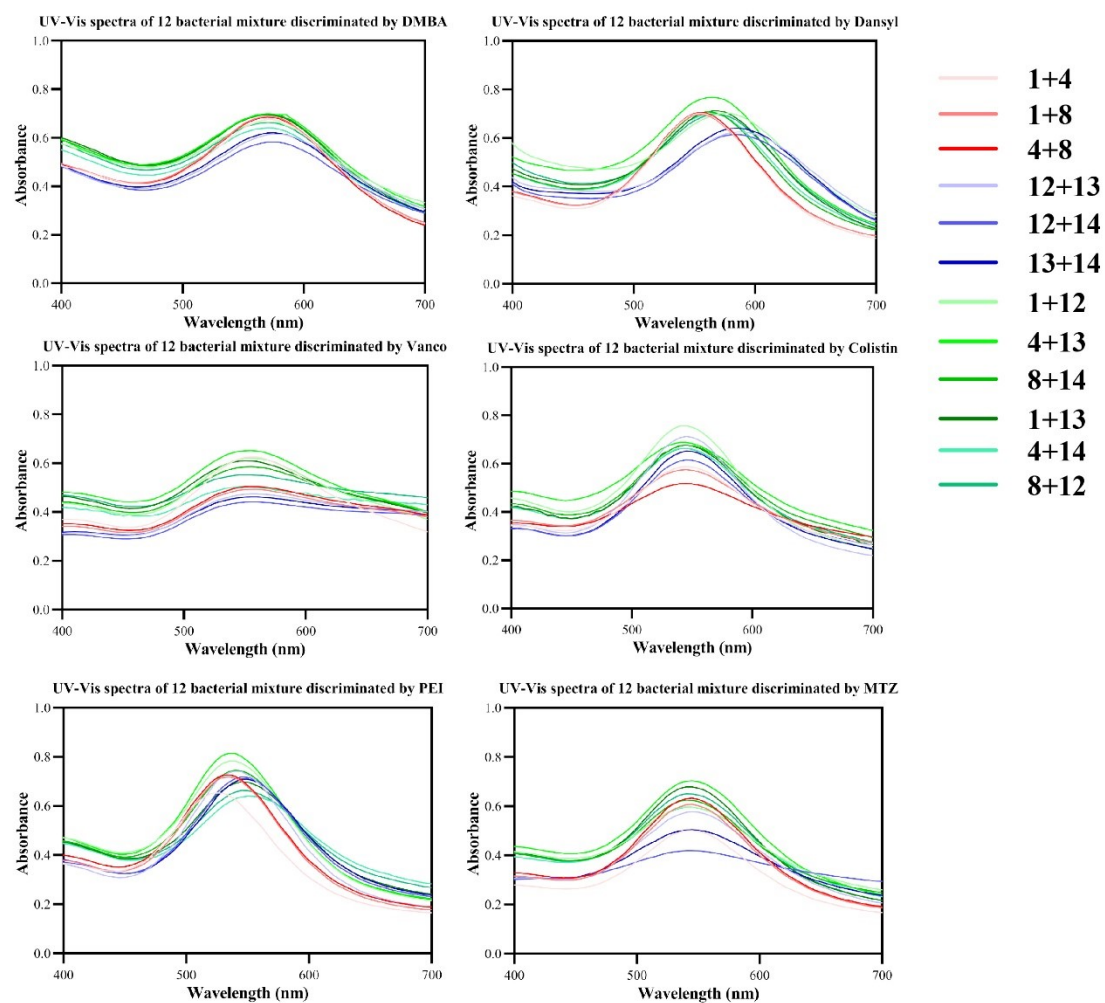

**Figure S3.** UV-Vis spectra of sensor arrays with 12 bacterial mixtures ( $OD_{600}=0.05$ ).

5. Using the “houghcircles” function in open CV to identify various wells in microplate

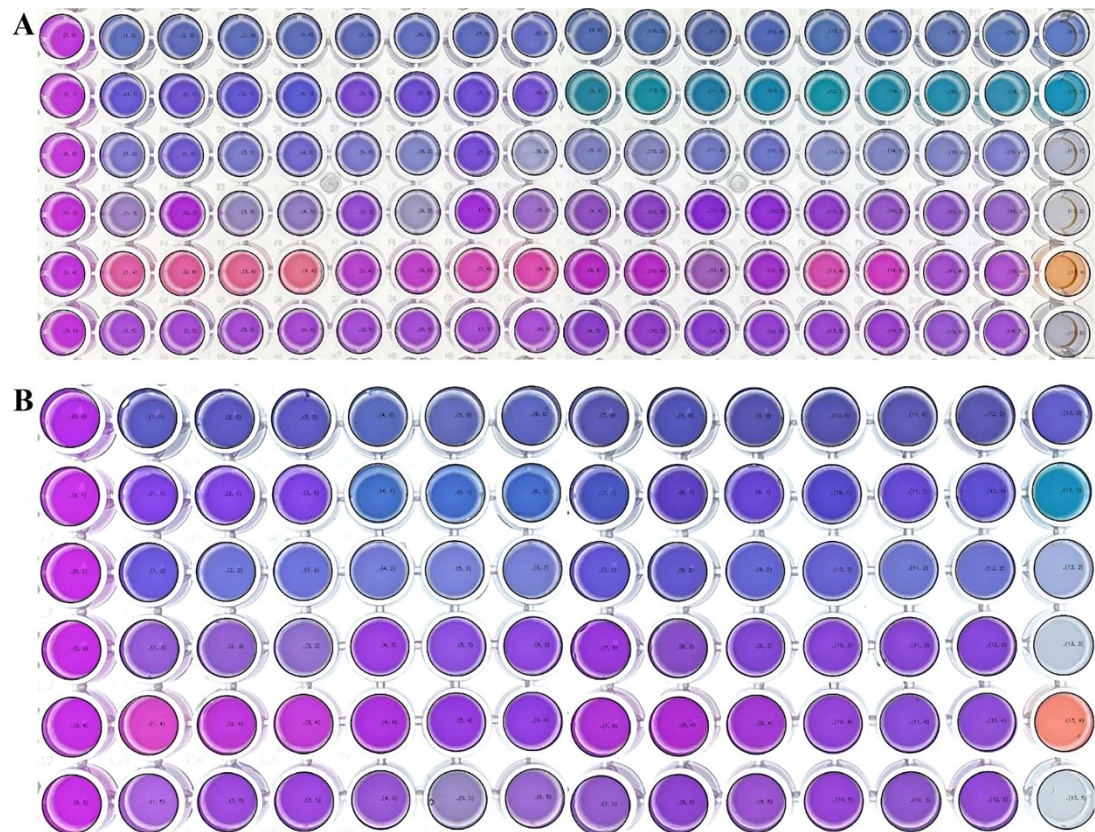

**Figure S4.** Discrimination of microplate wells by “houghcircles” function.

## 6. 4 LDA plots obtained by the 4 grayscale methods

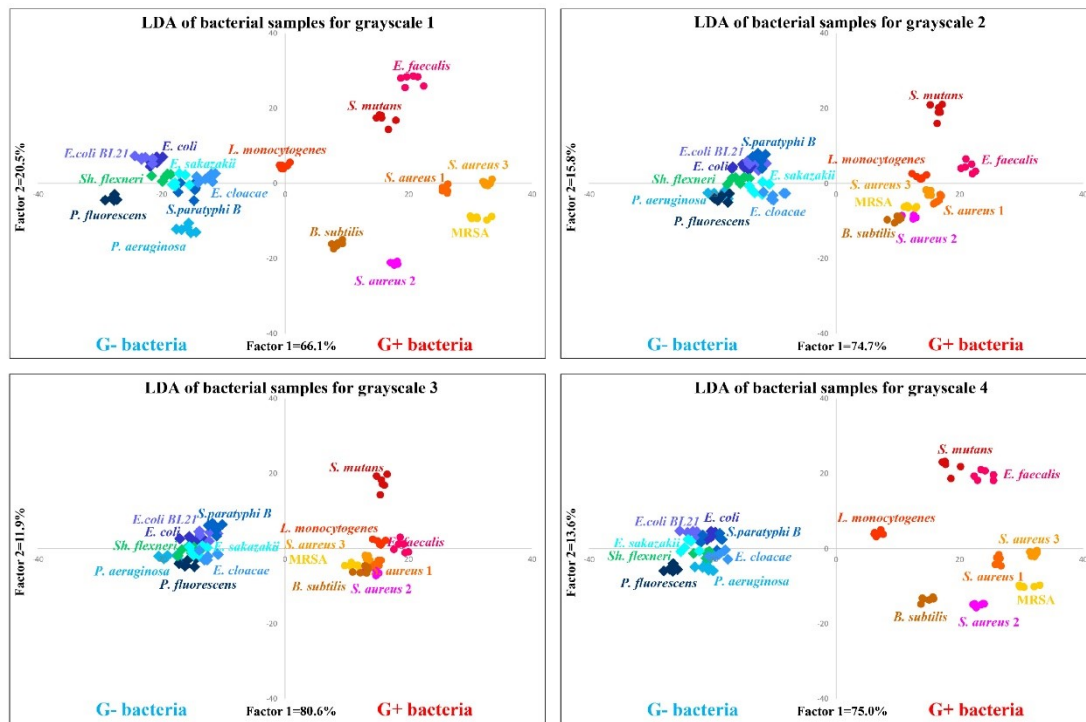

Figure S5. LDA plots of bacterial discrimination for the 4 grayscale methods

## 7. Colorimetric response patterns obtained by the grayscale value

**Table S3.** Colorimetric response patterns of 16 bacteria

|                      | DMBA    | Dansyl  | Vanco   | Colistin | PEI     | MTZ     |
|----------------------|---------|---------|---------|----------|---------|---------|
| <i>S. aureus</i> 1   | 112.216 | 100.322 | 130.427 | 137.035  | 157.925 | 125.690 |
| <i>S. aureus</i> 1   | 108.270 | 100.261 | 130.270 | 139.144  | 157.811 | 127.864 |
| <i>S. aureus</i> 1   | 110.216 | 100.560 | 131.568 | 139.557  | 158.925 | 124.391 |
| <i>S. aureus</i> 1   | 109.515 | 98.859  | 126.378 | 137.557  | 158.224 | 126.864 |
| <i>S. aureus</i> 1   | 108.270 | 100.261 | 126.193 | 138.557  | 157.224 | 126.163 |
| <i>S. aureus</i> 1   | 110.629 | 99.446  | 126.307 | 138.454  | 158.088 | 125.978 |
| <i>S. aureus</i> 2   | 107.010 | 101.674 | 111.359 | 108.699  | 162.835 | 129.098 |
| <i>S. aureus</i> 2   | 107.423 | 99.789  | 111.604 | 108.699  | 162.362 | 128.500 |
| <i>S. aureus</i> 2   | 106.352 | 102.386 | 110.832 | 108.699  | 162.248 | 127.201 |
| <i>S. aureus</i> 2   | 105.548 | 98.561  | 111.718 | 107.770  | 163.194 | 127.087 |
| <i>S. aureus</i> 2   | 108.124 | 101.500 | 108.473 | 108.699  | 163.362 | 124.223 |
| <i>S. aureus</i> 2   | 106.548 | 102.087 | 111.245 | 108.699  | 162.835 | 126.500 |
| <i>S. aureus</i> 3   | 110.330 | 95.963  | 129.829 | 145.134  | 164.069 | 124.505 |
| <i>S. aureus</i> 3   | 109.515 | 95.077  | 132.128 | 145.433  | 165.183 | 124.978 |
| <i>S. aureus</i> 3   | 109.874 | 95.963  | 132.302 | 145.134  | 164.411 | 123.690 |
| <i>S. aureus</i> 3   | 109.330 | 95.077  | 131.715 | 145.134  | 163.482 | 123.391 |
| <i>S. aureus</i> 3   | 109.515 | 95.490  | 131.715 | 147.852  | 164.770 | 123.391 |
| <i>S. aureus</i> 3   | 109.330 | 94.490  | 129.655 | 145.134  | 164.069 | 125.380 |
| MRSA                 | 111.439 | 97.371  | 119.512 | 135.775  | 168.440 | 123.804 |
| MRSA                 | 109.254 | 95.485  | 118.925 | 134.209  | 167.142 | 123.847 |
| MRSA                 | 110.439 | 95.485  | 119.512 | 134.373  | 166.266 | 124.032 |
| MRSA                 | 105.380 | 96.371  | 118.925 | 136.661  | 168.853 | 122.690 |
| MRSA                 | 111.439 | 91.882  | 119.626 | 136.486  | 169.081 | 125.092 |
| MRSA                 | 111.140 | 91.882  | 119.925 | 134.188  | 169.668 | 123.391 |
| <i>nonocytogenes</i> | 107.885 | 104.913 | 138.731 | 113.777  | 126.148 | 126.956 |
| <i>nonocytogenes</i> | 110.771 | 102.326 | 139.731 | 113.364  | 125.034 | 128.956 |
| <i>nonocytogenes</i> | 109.885 | 102.913 | 140.318 | 111.478  | 125.148 | 128.543 |
| <i>nonocytogenes</i> | 108.885 | 102.326 | 139.731 | 112.777  | 124.447 | 125.070 |
| <i>nonocytogenes</i> | 110.472 | 103.326 | 140.731 | 115.364  | 125.707 | 127.358 |
| <i>nonocytogenes</i> | 110.771 | 103.913 | 138.503 | 113.777  | 124.550 | 126.657 |
| <i>E. faecalis</i>   | 113.628 | 97.142  | 145.396 | 165.065  | 130.716 | 123.701 |
| <i>E. faecalis</i>   | 113.824 | 96.626  | 144.510 | 164.065  | 124.542 | 120.054 |
| <i>E. faecalis</i>   | 113.813 | 98.625  | 147.695 | 160.521  | 128.770 | 123.956 |
| <i>E. faecalis</i>   | 114.123 | 97.142  | 148.396 | 165.652  | 126.944 | 123.587 |
| <i>E. faecalis</i>   | 113.650 | 96.843  | 150.695 | 163.065  | 126.656 | 123.587 |
| <i>E. faecalis</i>   | 113.628 | 96.843  | 146.396 | 166.951  | 126.656 | 125.956 |
| <i>B. subtilis</i>   | 110.330 | 98.587  | 105.788 | 104.520  | 142.738 | 126.554 |
| <i>B. subtilis</i>   | 110.629 | 95.103  | 103.892 | 107.520  | 142.325 | 124.608 |
| <i>B. subtilis</i>   | 110.330 | 96.587  | 105.788 | 105.808  | 143.738 | 127.739 |
| <i>B. subtilis</i>   | 110.330 | 97.701  | 105.603 | 104.510  | 143.972 | 126.070 |
| <i>B. subtilis</i>   | 104.700 | 95.701  | 104.603 | 106.509  | 141.869 | 128.326 |
| <i>B. subtilis</i>   | 110.102 | 98.174  | 102.017 | 104.510  | 142.919 | 126.739 |
| <i>S. mutans</i>     | 110.145 | 103.076 | 171.288 | 133.769  | 147.060 | 124.657 |
| <i>S. mutans</i>     | 109.145 | 101.191 | 177.173 | 135.655  | 147.174 | 125.657 |
| <i>S. mutans</i>     | 112.031 | 102.375 | 175.760 | 135.068  | 142.473 | 125.070 |
| <i>S. mutans</i>     | 110.145 | 102.191 | 179.418 | 132.182  | 144.473 | 123.369 |
| <i>S. mutans</i>     | 109.504 | 104.261 | 178.059 | 135.655  | 144.473 | 124.657 |
| <i>S. mutans</i>     | 112.031 | 104.375 | 180.532 | 133.068  | 146.060 | 125.358 |
| <i>E. coli</i>       | 103.687 | 111.039 | 130.675 | 103.405  | 106.405 | 98.105  |
| <i>E. coli</i>       | 102.274 | 111.338 | 129.675 | 100.992  | 106.405 | 99.105  |
| <i>E. coli</i>       | 102.274 | 109.224 | 130.675 | 101.992  | 104.879 | 97.105  |
| <i>E. coli</i>       | 101.687 | 108.637 | 128.202 | 97.993   | 105.291 | 96.991  |
| <i>E. coli</i>       | 98.687  | 109.925 | 128.789 | 100.992  | 104.476 | 96.105  |
| <i>E. coli</i>       | 100.687 | 110.811 | 129.789 | 101.992  | 106.291 | 97.991  |
| <i>E. coli</i> BL21  | 108.155 | 117.055 | 134.403 | 100.530  | 107.405 | 100.959 |
| <i>E. coli</i> BL21  | 106.269 | 116.354 | 130.219 | 100.530  | 107.818 | 98.372  |
| <i>E. coli</i> BL21  | 108.269 | 115.653 | 133.219 | 99.644   | 105.476 | 98.372  |
| <i>E. coli</i> BL21  | 107.568 | 114.653 | 132.518 | 98.231   | 105.291 | 96.187  |
| <i>E. coli</i> BL21  | 107.269 | 115.653 | 131.518 | 99.231   | 102.993 | 96.247  |
| <i>E. coli</i> BL21  | 107.568 | 114.240 | 131.219 | 99.231   | 103.651 | 98.546  |
| <i>. aeruginosa</i>  | 94.894  | 105.913 | 115.897 | 88.973   | 123.105 | 98.088  |
| <i>. aeruginosa</i>  | 96.068  | 106.913 | 113.310 | 88.087   | 126.403 | 98.088  |
| <i>. aeruginosa</i>  | 94.068  | 105.212 | 114.310 | 85.675   | 122.746 | 98.088  |
| <i>. aeruginosa</i>  | 94.894  | 104.212 | 112.897 | 86.262   | 125.218 | 95.675  |
| <i>. aeruginosa</i>  | 94.068  | 106.913 | 114.310 | 85.675   | 122.447 | 97.088  |
| <i>. aeruginosa</i>  | 93.481  | 103.397 | 113.125 | 87.675   | 123.180 | 94.263  |
| <i>. fluorescens</i> | 93.985  | 109.342 | 112.108 | 89.446   | 99.910  | 100.333 |
| <i>. fluorescens</i> | 93.344  | 109.342 | 110.695 | 88.148   | 101.393 | 98.333  |
| <i>. fluorescens</i> | 94.572  | 109.342 | 107.923 | 88.560   | 99.980  | 100.333 |
| <i>. fluorescens</i> | 93.572  | 107.054 | 108.282 | 88.674   | 100.806 | 96.447  |
| <i>. fluorescens</i> | 90.854  | 109.342 | 108.108 | 87.920   | 98.568  | 99.447  |
| <i>. fluorescens</i> | 94.572  | 107.054 | 106.810 | 88.919   | 99.383  | 94.529  |
| <i>paratyphi B</i>   | 105.970 | 116.930 | 139.534 | 94.589   | 125.766 | 102.485 |
| <i>paratyphi B</i>   | 107.948 | 117.930 | 139.833 | 96.312   | 124.353 | 102.485 |
| <i>paratyphi B</i>   | 110.731 | 115.044 | 136.648 | 94.703   | 123.353 | 103.257 |
| <i>paratyphi B</i>   | 107.856 | 118.631 | 137.648 | 95.703   | 121.653 | 99.372  |
| <i>paratyphi B</i>   | 108.856 | 118.930 | 133.649 | 92.899   | 127.353 | 101.485 |
| <i>paratyphi B</i>   | 109.443 | 118.930 | 135.061 | 92.529   | 123.213 | 98.475  |
| <i>Sh. flexneri</i>  | 96.670  | 114.120 | 124.370 | 103.884  | 111.817 | 97.768  |
| <i>Sh. flexneri</i>  | 97.431  | 114.821 | 124.370 | 103.465  | 110.817 | 99.365  |
| <i>Sh. flexneri</i>  | 97.431  | 114.120 | 121.485 | 100.547  | 110.817 | 98.953  |
| <i>Sh. flexneri</i>  | 96.431  | 114.821 | 123.485 | 100.412  | 107.991 | 99.365  |
| <i>Sh. flexneri</i>  | 97.143  | 111.419 | 121.958 | 101.878  | 110.518 | 94.540  |
| <i>Sh. flexneri</i>  | 97.431  | 108.951 | 118.485 | 99.992   | 109.051 | 94.882  |
| <i>E. sakazakii</i>  | 104.817 | 112.125 | 123.713 | 103.063  | 110.237 | 105.078 |
| <i>E. sakazakii</i>  | 106.404 | 113.125 | 122.713 | 104.063  | 111.824 | 104.850 |
| <i>E. sakazakii</i>  | 103.117 | 112.011 | 120.713 | 102.134  | 113.236 | 109.209 |
| <i>E. sakazakii</i>  | 104.817 | 112.125 | 119.414 | 99.177   | 111.525 | 104.437 |
| <i>E. sakazakii</i>  | 103.818 | 113.011 | 118.713 | 100.177  | 110.422 | 105.437 |
| <i>E. sakazakii</i>  | 105.404 | 110.712 | 120.941 | 99.063   | 110.720 | 104.437 |
| <i>E. cloacae</i>    | 105.970 | 114.505 | 118.092 | 112.917  | 116.051 | 104.812 |
| <i>E. cloacae</i>    | 106.084 | 114.505 | 118.092 | 111.917  | 115.361 | 104.812 |
| <i>E. cloacae</i>    | 105.970 | 111.918 | 114.320 | 109.733  | 115.845 | 103.926 |
| <i>E. cloacae</i>    | 105.970 | 113.505 | 112.918 | 110.032  | 111.465 | 103.399 |
| <i>E. cloacae</i>    | 105.084 | 112.918 | 117.978 | 105.733  | 115.144 | 103.513 |
| <i>E. cloacae</i>    | 105.557 | 113.505 | 116.978 | 109.032  | 115.361 | 103.268 |

**Table S4.** Colorimetric response patterns of 12 bacterial mixtures

|       | DMBA    | Dansyl  | Vanco   | Colistin | PEI     | MTZ     |
|-------|---------|---------|---------|----------|---------|---------|
| 1+4   | 87.309  | 93.783  | 93.393  | 106.992  | 122.176 | 135.698 |
| 1+4   | 87.608  | 93.783  | 93.795  | 106.878  | 123.193 | 135.111 |
| 1+4   | 87.309  | 92.897  | 92.094  | 107.405  | 123.062 | 133.111 |
| 1+4   | 86.309  | 92.370  | 91.796  | 105.291  | 123.492 | 135.698 |
| 1+4   | 88.309  | 92.783  | 92.795  | 107.106  | 124.079 | 135.285 |
| 1+4   | 86.309  | 91.783  | 92.322  | 106.878  | 122.421 | 135.698 |
| 1+8   | 85.309  | 90.534  | 112.515 | 111.954  | 115.343 | 113.415 |
| 1+8   | 85.423  | 90.936  | 112.102 | 111.367  | 114.343 | 115.529 |
| 1+8   | 84.537  | 90.534  | 113.401 | 111.894  | 113.756 | 112.529 |
| 1+8   | 85.309  | 89.708  | 113.401 | 110.367  | 114.642 | 115.415 |
| 1+8   | 84.423  | 89.936  | 112.287 | 110.666  | 115.169 | 114.116 |
| 1+8   | 83.722  | 89.050  | 113.689 | 111.068  | 114.229 | 113.828 |
| 4+8   | 85.010  | 92.392  | 114.102 | 121.564  | 114.702 | 115.034 |
| 4+8   | 83.950  | 90.979  | 123.502 | 121.852  | 114.816 | 114.149 |
| 4+8   | 84.239  | 91.979  | 115.102 | 120.678  | 115.115 | 113.035 |
| 4+8   | 85.238  | 92.278  | 114.515 | 121.564  | 114.115 | 115.034 |
| 4+8   | 84.413  | 90.979  | 115.102 | 120.151  | 115.115 | 114.736 |
| 4+8   | 83.239  | 89.865  | 115.102 | 121.379  | 113.816 | 114.035 |
| 12+13 | 103.463 | 106.953 | 117.292 | 97.946   | 106.230 | 111.062 |
| 12+13 | 104.523 | 107.654 | 119.178 | 98.349   | 107.072 | 111.351 |
| 12+13 | 104.284 | 107.768 | 118.292 | 97.946   | 106.773 | 109.764 |
| 12+13 | 104.463 | 106.953 | 118.292 | 97.946   | 107.001 | 111.062 |
| 12+13 | 103.115 | 106.366 | 117.292 | 97.648   | 105.062 | 111.351 |
| 12+13 | 102.876 | 106.067 | 118.292 | 97.762   | 105.475 | 110.764 |
| 12+14 | 107.116 | 105.185 | 125.152 | 103.616  | 97.604  | 138.952 |
| 12+14 | 108.116 | 104.186 | 127.151 | 104.730  | 98.191  | 138.952 |
| 12+14 | 106.116 | 103.887 | 126.151 | 102.915  | 97.490  | 138.952 |
| 12+14 | 106.529 | 101.186 | 125.152 | 103.915  | 96.490  | 138.952 |
| 12+14 | 105.117 | 104.598 | 125.152 | 103.029  | 95.964  | 137.952 |
| 12+14 | 107.116 | 103.186 | 126.151 | 102.328  | 96.490  | 138.952 |
| 13+14 | 100.023 | 101.186 | 123.152 | 99.703   | 102.248 | 121.852 |
| 13+14 | 101.023 | 102.599 | 123.266 | 99.404   | 103.949 | 121.151 |
| 13+14 | 101.414 | 100.186 | 119.793 | 98.589   | 102.949 | 122.852 |
| 13+14 | 100.550 | 101.186 | 122.739 | 97.404   | 103.835 | 121.151 |
| 13+14 | 100.436 | 102.186 | 124.152 | 98.703   | 102.949 | 121.852 |
| 13+14 | 102.012 | 101.186 | 124.152 | 97.290   | 101.949 | 119.966 |
| 1+12  | 102.713 | 91.805  | 95.943  | 97.768   | 108.964 | 118.106 |
| 1+12  | 103.300 | 91.919  | 95.117  | 96.469   | 109.665 | 117.992 |
| 1+12  | 102.713 | 90.392  | 95.117  | 97.469   | 108.964 | 117.107 |
| 1+12  | 103.414 | 92.218  | 95.117  | 98.469   | 109.964 | 118.106 |
| 1+12  | 102.012 | 91.919  | 95.943  | 97.480   | 108.964 | 117.694 |
| 1+12  | 101.599 | 90.919  | 95.117  | 98.708   | 108.964 | 117.107 |
| 4+13  | 91.859  | 82.177  | 97.227  | 104.095  | 107.128 | 106.410 |
| 4+13  | 91.642  | 80.291  | 96.227  | 103.095  | 108.302 | 106.182 |
| 4+13  | 91.457  | 82.938  | 97.227  | 102.981  | 107.416 | 105.595 |
| 4+13  | 91.642  | 83.237  | 95.928  | 104.095  | 107.829 | 106.708 |
| 4+13  | 92.044  | 82.291  | 96.227  | 101.868  | 107.074 | 106.182 |
| 4+13  | 93.310  | 83.237  | 97.227  | 101.982  | 106.829 | 106.708 |
| 8+14  | 93.392  | 88.921  | 102.157 | 100.307  | 107.339 | 112.937 |
| 8+14  | 93.278  | 86.921  | 102.157 | 100.307  | 107.883 | 112.937 |
| 8+14  | 94.392  | 88.921  | 101.869 | 98.720   | 106.410 | 113.051 |
| 8+14  | 93.392  | 87.921  | 102.157 | 99.606   | 106.823 | 111.938 |
| 8+14  | 93.392  | 87.035  | 101.570 | 99.606   | 106.524 | 113.937 |
| 8+14  | 93.278  | 88.921  | 102.456 | 100.307  | 106.410 | 112.937 |
| 1+13  | 91.392  | 80.237  | 102.091 | 99.763   | 102.502 | 111.149 |
| 1+13  | 90.392  | 82.237  | 102.091 | 98.763   | 103.089 | 109.263 |
| 1+13  | 90.919  | 81.009  | 98.977  | 99.763   | 102.388 | 110.263 |
| 1+13  | 90.278  | 80.237  | 101.977 | 98.763   | 101.790 | 110.149 |
| 1+13  | 90.164  | 79.824  | 101.749 | 99.763   | 102.502 | 108.562 |
| 1+13  | 92.392  | 82.650  | 101.091 | 99.763   | 104.089 | 107.562 |
| 4+14  | 99.914  | 86.188  | 116.957 | 100.122  | 101.422 | 117.704 |
| 4+14  | 99.501  | 85.661  | 116.843 | 98.823   | 102.721 | 114.292 |
| 4+14  | 99.273  | 86.258  | 115.669 | 100.122  | 102.422 | 116.704 |
| 4+14  | 100.561 | 84.373  | 114.555 | 100.122  | 99.422  | 113.531 |
| 4+14  | 97.974  | 84.960  | 115.669 | 100.122  | 100.835 | 115.705 |
| 4+14  | 99.675  | 85.960  | 116.256 | 99.122   | 103.422 | 114.292 |
| 8+12  | 96.675  | 84.488  | 112.011 | 99.986   | 100.868 | 111.269 |
| 8+12  | 98.974  | 83.901  | 111.310 | 97.976   | 101.868 | 108.682 |
| 8+12  | 97.974  | 81.026  | 112.011 | 97.976   | 100.868 | 110.269 |
| 8+12  | 98.974  | 83.200  | 110.652 | 99.687   | 101.868 | 108.383 |
| 8+12  | 95.974  | 82.026  | 111.897 | 97.976   | 100.868 | 109.682 |
| 8+12  | 97.974  | 81.428  | 111.310 | 98.976   | 101.868 | 107.796 |
